# Supplementary material for: Impact of colonization with multidrug-resistant organisms on antibiotic prophylaxis in patients with cirrhosis and variceal bleeding
Source: PubMed Central journal article supplement (PMC9128949; doi:10.1371/journal.pone.0268638), 2022-05-24
Supplement: pone.0268638.s001.pdf [file pone.0268638.s001.pdf]

**S1 Table. Focus of confirmed de-novo infection within 10 days after bleeding event.**

| <b>Focus</b> | <b>Patients with de-novo infection (n=27)</b> |
|--------------|-----------------------------------------------|
| Pulmonal     | 8 (29.6)                                      |
| Abdominal    | 6 (22.2)                                      |
| Urinary      | 6 (22.2)                                      |
| Blood        | 3 (11.1)                                      |
| Skin         | 3(11.1)                                       |
| Other        | 1 (3.7)                                       |
