# Supplementary material for: Impact of colonization with multidrug-resistant organisms on antibiotic prophylaxis in patients with cirrhosis and variceal bleeding
Source: PubMed Central journal article supplement (PMC9128949; doi:10.1371/journal.pone.0268638), 2022-05-24
Supplement: pone.0268638.s002.pdf [file pone.0268638.s002.pdf]

**S2 Table. Detailed characteristics of MDRO colonization at admission, de-novo colonization during follow-up and MDRO infection during follow-up.**

| Characteristics                                        | All patients (n=97) |
|--------------------------------------------------------|---------------------|
| MDRO colonization at admission, n (%)                  | 34 (35.1)           |
| ESBL <i>E. coli</i> , n (%)                            | 16 (16.5)           |
| ESBL <i>K. pneumoniae</i> , n (%)                      | 0 (0)               |
| CR Enterbacteriaceae, n (%)                            | 3 (3.1)             |
| Amp-C Enterobacter spp., n (%)                         | 2 (2.1)             |
| CR <i>P. aeruginosa</i> spp., n (%)                    | 2 (2.1)             |
| VR Enterococcus spp., n (%)                            | 13 (13.4)           |
| other MDR bacteria, n (%)                              | 2 (2.1)             |
| MRSA, n (%)                                            | 1 (1.0)             |
| MDRO colonization during follow-up, n (%)              | 31 (32.0)           |
| ESBL <i>E. coli</i> , n (%)                            | 3 (3.1)             |
| ESBL <i>K. pneumoniae</i> , n (%)                      | 2 (2.1)             |
| CR Enterbacteriaceae, n (%)                            | 0 (0)               |
| Amp-C Enterobacter spp., n (%)                         | 4 (4.1)             |
| CR <i>P. aeruginosa</i> spp., n (%)                    | 1 (1.0)             |
| VR Enterococcus spp., n (%)                            | 22 (22.7)           |
| other MDR bacteria, n (%)                              | 3 (3.1)             |
| MRSA, n (%)                                            | 0 (0)               |
| MDRO infection during follow up, n (%)                 | 13 (13.4)           |
| ESBL <i>E. coli</i> , n (%)                            | 4 (4.1)             |
| ESBL <i>K. pneumoniae</i> , n (%)                      | 1 (1.0)             |
| CR Enterbacteriaceae, n (%)                            | 0 (0)               |
| Amp-C Enterobacter spp., n (%)                         | 3 (3.1)             |
| CR <i>P. aeruginosa</i> spp., n (%)                    | 1 (1.0)             |
| VR Enterococcus spp., n (%)                            | 6 (6.2)             |
| Other MDR bacteria, n (%)                              | 2 (2.1)             |
| MRSA, n (%)                                            | 0 (0.0)             |
| Infections with the same MDRO isolated in rectal swaps | 11 (84.6)           |

Abbreviations: CR, carbapenem-resistant; ESBL, Extended-spectrum beta-lactamase; MDRO, multidrug-resistant organisms; MRSA, methicillin-resistant *Staphylococcus aureus*; VR, vancomycin-resistant.
