# Supplementary material for: Impact of colonization with multidrug-resistant organisms on antibiotic prophylaxis in patients with cirrhosis and variceal bleeding
Source: PubMed Central journal article supplement (PMC9128949; doi:10.1371/journal.pone.0268638), 2022-05-24
Supplement: pone.0268638.s003.pdf [file pone.0268638.s003.pdf]

**S3 Table. Patients' characteristics according to the adequacy of antibiotic prophylaxis.**

| Characteristics                           | Adequate antibiotic prophylaxis (n=68) | Inadequate antibiotic prophylaxis (n=29) | P-value            |
|-------------------------------------------|----------------------------------------|------------------------------------------|--------------------|
| Age, y, median (IQR)                      | 58 (12)                                | 55 (7)                                   | 0.991              |
| Male sex, n (%)                           | 54 (79.4)                              | 22 (75.9)                                | 0.789              |
| Etiology of cirrhosis                     |                                        |                                          |                    |
| Alcohol, n (%)                            | 31 (45.6)                              | 17 (58.6)                                | 0.273              |
| Viral Hepatitis, n (%)                    | 18 (26.4)                              | 6 (20.7)                                 | 0.616              |
| NASH, n (%)                               | 3 (4.4)                                | 1 (3.4)                                  | 1.000              |
| Cryptogenic, n (%)                        | 4 (5.9)                                | 1 (3.4)                                  | 1.000              |
| other, n (%)                              | 12 (17.6)                              | 4 (13.8)                                 | 0.770              |
| ICU admission during hospital stay, n (%) | 66 (97.1)                              | 27 (93.1)                                | 0.581              |
| Days on ICU, median (IQR)                 | 5(3)                                   | 4(2)                                     | 0.574              |
| Hemorrhagic shock at bleeding, n (%)      | 42 (61.8)                              | 12 (41.4)                                | 0.077              |
| Stage of liver disease                    |                                        |                                          |                    |
| MELD-Score, median (IQR)                  | 17 (5)                                 | 17 (6)                                   | 0.270              |
| Child-Pugh B/C n (%)                      | 59 (86.7)                              | 23 (79.3)                                | 0.370              |
| Ascites, n (%)                            | 50 (73.5)                              | 21 (72.4)                                | 1.000              |
| ACLF present at bleeding, n (%)           | 34 (50.0)                              | 12 (41.4)                                | 0.508              |
| Endoscopy findings/therapy                |                                        |                                          |                    |
| Time to endoscopy, hours, IQR             | 2 (1)                                  | 2 (1)                                    | 1.000              |
| Grade of EV                               | 2 (0)                                  | 2 (0)                                    | 1.000              |
| Active bleeding at endoscopy              | 45 (66.2)                              | 21 (72.4)                                | 0.638              |
| Additional fundus varices                 | 24 (35.3)                              | 7 (24.1)                                 | 0.346              |
| Endoscopic treatment                      | 63 (92.6)                              | 28 (96.6)                                | 0.665              |
| EV ligation                               | 48 (70.6)                              | 23 (79.3)                                | 0.458              |
| Injection therapy                         | 14 (20.6)                              | 5 (17.2)                                 | 0.787              |
| EV Stenting                               | 2 (2.9)                                | 1 (3.4)                                  | 1.000              |
| TIPS placement during hospitalization     | 7 (10.3)                               | 4 (13.8)                                 | 0.729              |
| Terlipressin treatment for 3-5 days       | 54 (79.4)                              | 23 (79.3)                                | 1.000              |
| MDRO colonization at baseline, n (%)      | 9 (13.2)                               | 25 (86.2)                                | <b>&lt; 0.0001</b> |
| Outcome, n (%)                            |                                        |                                          |                    |
| ACLF day 7                                | 18 (26.5)                              | 8 (27.6)                                 | 1.000              |
| Liver transplantation                     | 5 (7.4)                                | 1 (3.4)                                  | 0.665              |
| Death/liver transplantation within        |                                        |                                          |                    |
| 30 days, n (%)                            | 23 (33.8)                              | 5 (17.2)                                 | 0.142              |
| 365 days, n (%)                           | 29 (59.2)                              | 14 (48.3)                                | 0.659              |

Abbreviations: ACLF, acute-on-chronic liver failure; CI, confidence interval; EV, esophageal varices; ICU, intensive care; IQR; interquartile-range; MELD, model for end-stage liver disease; MDRO, multidrug-resistant organism; NASH, non-alcoholic steato-hepatitis; SBP, spontaneous bacterial peritonitis.
